# Supplementary material
Source: PubMed Central journal article supplement (PMC3365189)
Supplement: 1202691109_pnas.201202691SI.pdf [file 1202691109_pnas.201202691SI.pdf]

# Supporting Information

Zhang et al. 10.1073/pnas.1202691109

## SI Methods

**Cell Lines, cDNA Constructs, and Transfection.** cDNAs encoding full-length human nicastrin (NCT) and NCT mutants were C-terminally tagged with CT11 tag (1). cDNAs encoding the entire ectodomain segment (ECD) or a region corresponding to exons 7–16 (“716”), exons 7–15 (“715”), residues 1–585 (NCT1-585), and residues 1–630 (NCT 1–630) were C-terminally tagged with 6xHis tag. HEK293 cells and HEK293S GnT1<sup>−</sup> cells (a kind gift from Kelly Moremen, University of Georgia, Athens, GA) (2) were stably transfected with NCT constructs using Lipofectamine and Plus reagent (Invitrogen). HEK293 cells, HEK293S GnT1<sup>−</sup> cells, and nicastrin knockout (NCT<sup>−/−</sup>) fibroblasts (kindly provided by Philip Wong, Johns Hopkins University School of Medicine, Baltimore, MD) (3) were maintained in DMEM containing 10% (vol/vol) FBS, 1% (wt/vol) penicillin-streptomycin (PS) (Invitrogen). To examine  $\gamma$ -secretase activity, a mouse Notch 1 lacking the ECD segment (NΔE)-6xmyc construct (4) and either WT or mutant NCT constructs were used to transiently cotransfect NCT<sup>−/−</sup> fibroblasts for 48 h before detergent-solubilized cell lysates were prepared for analysis. To assess conversion of full-length PS1 into PS1 fragments, either WT or mutant NCT constructs were used, along with cDNAs encoding human presenilin enhancer (PEN)-2, anterior pharynx defective (Aph)-1aL, and PS1, to cotransfect NCT<sup>−/−</sup> fibroblasts for 48 h before analysis of detergent-solubilized extracts.

**Western Blotting and Antibodies.** Cells were lysed in buffer containing 50 mM Tris-HCl (pH 7.4), 150 mM NaCl, 0.5% Nonidet P-40, 0.5% sodium deoxycholate, 5 mM EDTA, and protease inhibitor mixture (Sigma). Protein concentrations were determined by bicinchoninic acid kit (Thermo Scientific). Equal amounts of protein lysates were resolved on SDS/PAGE and transferred to nitrocellulose membrane. After blocking, the membrane was sequentially incubated with primary and secondary antibodies, and the secondary antibodies were detected with electrochemiluminescence (ECL; PerkinElmer). PS1<sub>NT</sub> antibody (1) was used to detect full-length and N-terminal fragment of PS1. PNT-2 (1) antibody (a kind gift of Gopal Thinakaran, University of Chicago, Chicago, IL) was used for the detection of PEN-2 protein. CT11 antibody (1) was used to detect CT11-tagged NCT and PEN-2. Nicastrin (N-19) antibody (Santa Cruz) was used to detect endogenous NCT. 9E10 (Santa Cruz) was used to detect myc-tagged Aph-1aL and 6-myc-tagged mNΔE fragments. Anti-6xHis antibody (Rockland) was used to detect 6xHis-tagged truncated NCT. CTM1 polyclonal antibody (5) was used for the detection of full-length amyloid precursor proteins (APP) and APP-carboxyl-terminal fragments (CTFs). 2D6 monoclonal antibody (6) was used to detect APPs and A $\beta$ .

**Purification of Secreted NCT Fragments.** HEK293S GnT1<sup>−</sup> cells stably expressing NCT ECD or 716 were cultured in DMEM containing 5% FBS and 1% PS. Conditioned medium was collected and filtered through a 0.45- $\mu$ m filter. Secreted ECD and 716 were precipitated in 80% ammonium sulfate, and this fraction was dissolved and dialyzed overnight in 1 $\times$  PBS (pH 7.5). Dialyzed samples were incubated with Ni-NTA beads (Invitrogen) and after extensive washing, bound ECD or 716 was eluted with buffer containing 50 mM sodium phosphate, 300 mM NaCl, and 300 mM imidazole (pH 7.4), dialyzed against 50 mM phosphate buffer (pH 7.4), concentrated, and further purified using a Superdex 200 column (GE Healthcare) in phosphate buffer containing 20 mM phosphate (pH 7.4) and 150 mM NaCl.

The purity of purified samples was assessed using Coomassie staining and Western blotting.

**Generation of Anti-nicastrin Synthetic Antibodies.** The synthetic antibody library built using the 4D5 Fab scaffold, selection methods, and hit characterization have been described previously (7). The ECD was purified from the conditioned medium of HEK293 cells, treated with Peptide: N-Glycosidase F (PNGaseF), and was biotinylated with sulfo-NHS-SS-biotin (Thermo Scientific). The target concentrations were 100 nM in the first round and 50 nM in the subsequent rounds.

**Fab Expression and Purification.** Fab2 and Fab12 expression was performed essentially as previously described (8). However, the transformants were first grown ~24 h at 30 °C in 1 L 2 $\times$  yeast tryptone broth supplemented with 100  $\mu$ g mL<sup>−1</sup> ampicillin. The cells were harvested and resuspended in 1 L of CRAP Media (8) that was initially depleted of phosphate by addition of 100 mM MgCl<sub>2</sub> and 100 mM NH<sub>4</sub>OH, sterile filtered, and pH-adjusted to 7.3. Fab2 and -12 were purified on a HiTrap Protein G HP column (GE Healthcare) using 20 mM sodium phosphate buffer and eluted with 0.1 M glycine-HCl (pH 2.7). The eluted Fabs were then loaded onto a Resource S column (GE Healthcare), washed with 50 mM sodium acetate buffer (pH 5.0), and eluted with a linear gradient of 50 mM sodium acetate buffer (pH 5.0) with 1 M NaCl. Fractions were verified by SDS/PAGE, pooled, and dialyzed to 20 mM sodium phosphate buffer (pH 7.4) with 150 mM NaCl.

**Immunoprecipitation of Secreted NCT Fragments with Anti-NCT Fabs.** Conditioned medium containing secreted NCT fragments were adjusted with 5 $\times$  PBS to a final concentration of 1 $\times$  PBS, 4  $\mu$ g of purified Fab was added, and the mixture was incubated overnight. The Fab-antigen complexes were captured with protein L beads (Thermo Scientific) and detected using Western blotting with the anti-6xHis antibody. For immunoprecipitation of NCT from solubilized HEK293 cell membranes, the reaction mixture contained 0.25% 3-[(3-cholamidopropyl)dimethylammonio]-2-hydroxy-1-propanesulfonate (CHAPSO).

**In Vitro  $\gamma$ -Secretase Activity Assay.**  $\gamma$ -Secretase complexes were purified from HEK293S cells that coexpress human PEN-2-CT11, Aph-1as, NCT-CT11, and TAP-tagged PS1 as described previously (9). Purified active  $\gamma$ -secretase was preincubated with either negative control Fab, a positive control antibody Mab5226A (10), Fab2, or Fab12 on ice for 1 h, and the  $\gamma$ -secretase activity was assayed using an APP (sb4, 1  $\mu$ M final concentration) or Notch1 substrate (11, 12). Reactions were performed at 37 °C for 150 min, and the production of Notch intracellular domain (NICD) or A $\beta$  peptides was determined using ECL or AlphaLISA signals (11, 12).

**Immunostaining of HEK293 ANPP.8 Cells.** HEK293 cells stably expressing Aph-1as, nicastrin-CT11, PS1, and PEN-2-CT11 (6) were seeded on chamber slides (Thermo Scientific/Nunc) and grown in DMEM with 10% FBS, 1% PS, and 200  $\mu$ g of G418. After being washed three times with dialyzed phosphate buffered saline (DPBS) (Invitrogen), cells were fixed with prechilled methanol for 10 min on ice and rehydrated with DPBS. All subsequent incubations were carried out at room temperature in a humid covered dish to prevent drying. Cells were then blocked with 5% goat serum for 30 min. Fab stocks (0.02 mg/mL) were prepared in DPBS and incubated with cells for 1 h, followed by

three washes with DPBS. FITC-conjugated goat anti-human antibody was incubated with cells for 1 h in the dark. After three washes with DPBS, slides were mounted and bound antibodies visualized by under an inverted microscopy, and confocal images were acquired on a confocal laser-scanning microscope using FluoView software (Olympus). For NCT staining, fixed ANPP.8 cells were incubated with affinity-purified NCT54 antibody (6) at 10 °C for 45 min without prior fixation, as previously described (13). For analysis of PS1 localization, cells were fixed, permeabilized in 0.2% Triton X-100 (Tx-100), and incubated with affinity-purified PS1<sub>NT</sub> antibody in PBS/0.2% Tx-100/1% BSA overnight at 4 °C. After incubation with primary antibodies, double staining was carried out with Cy5-conjugated anti-rabbit secondary antibodies (Jackson ImmunoResearch) for 1 h at room temperature. After washing with PBS, cells were mounted onto glass slides with Aqua Poly/Mount (Polyscience). Immunofluorescence staining was examined under an inverted microscopy using a 60× oil immersion objective. For lectin staining of cell-surface glycoproteins, FITC-conjugated *Vicia Villosa* agglutinin (VVA; Vector Laboratories; 10 µg/mL) were directly added during the secondary antibody incubation. Identical photomultiplier values and parameters were used to acquire images to compare signals between cells.

**PNGaseF and Endo H Treatment.** For PNGaseF treatment, whole-cell detergent lysates or purified NCT fragments were first supplemented with glycoprotein denaturation buffer (0.5% SDS, 40 mM DTT) and incubated at room temperature for 10 min. Nonidet P-40 was then added to the mixture to a final concentration of 1%. G7 buffer [50 mM sodium phosphate (pH 7.5)] and PNGaseF (100 U) (New England Biolabs) were then added to the mixture and incubated for 1 h at 37 °C. For Endo H treatment, whole-cell detergent lysates or purified NCT fragments were supplemented with glycoprotein denaturation buffer and incubated at room temperature for 10 min, G5 buffer [50 mM sodium citrate (pH 5.5)] and Endo H (200 U) (New England Biolabs) were then added to the mixture and incubated for 1 h at 37 °C. At the end of the incubation, 4× Laemmli sample buffer was added to the mixture to quench the reaction. To generate ECD for Fab selection, ECD was treated with PNGaseF in G7 buffer without denaturation.

**Circular Dichroism Spectroscopy (CD).** Purified proteins (~300–400 µg/mL) were dialyzed against 10 mM sodium phosphate buffer (pH 7.0) containing 100 mM NaCl. CD spectra for 200–250 nm in 0.5-nm steps with a 1-nm bandwidth and a 2-s averaging time were recorded at 25 °C on an AVIV 202 Spectrometer (AVIV Bio-medical) using a 1-mm path-length quartz cuvette. Triplicate wavelength scans were averaged, buffer subtracted, and converted to mean residual ellipticity as previously described (14).

**Surface Plasmon Resonance (SPR).** All measurements were carried out on either a BIAcore 2000 or 3000 instrument at 20 °C. His-tagged ECD from GnTI<sup>−</sup> cell medium was immobilized on a Ni-NTA chip (GE Healthcare), and Fabs were flowed in NTA running buffer [10 mM Hepes (pH 7.4), 150 mM NaCl, 50 µM EDTA, 0.005% Tween 20] following methods provided by the manufacturer. For epitope mapping experiments, His-tagged ECD was immobilized on the NTA surface, and pairwise injections of 2 µM Fabs were flowed at 10 µL/min. Data were double referenced by subtracting both a blank flow channel and buffer injections and processed using Scrubber2 (BioLogic Software). For kinetic measurements, either His-tagged ECD or 716 was immobilized on the NTA surface, and duplicate injections of threefold serial dilutions (2.5–200 nM) of each Fab were injected over three flow channels (each with varying 6His-NCT immobilization levels) at a flow rate of 30 µL/min. Each data set was double referenced, processed, and globally fit to

a 1:1 bimolecular Langmuir model using Scrubber2. The reported  $K_d$  values represent an average of the global fits to each of the triplicate data sets.

**Differential Scanning Fluorimetry (DSF).** DSF measurements were performed on a BioRad-CFX384 real-time PCR instrument (BioRad Laboratories). Fab and ECD samples, 1 µM each, were prepared in 50 mM sodium phosphate buffer (pH 7.4) with 150 mM sodium chloride and 4× (1/1,250 dilution of stock) Sypro Orange dye (Life Technologies) to a total sample volume of 25 µL. Thermal melts were performed by heating the samples 25 °C to 95 °C, increasing the temperature in steps of 0.5 °C/30 s. Wavelengths of 490 and 575 nm were used for excitation and emission, respectively. Samples were processed with the CFX software provided by the manufacturer.

**Coimmunoprecipitation of  $\gamma$ -Secretase Complex Under Native Conditions.** NCT<sup>−/−</sup> fibroblasts expressing human Aph-1aL-Myc-His, PS1, PEN-2-CT11, and either WT or L571 mutant NCT were lysed in a buffer containing 50 mM Tris-Cl (pH 8), 150 mM NaCl, 1% CHAPSO, 1 mM DTT, 5 mM EDTA, and 1× protease mixture (Sigma). Cell lysates were precleared with protein A beads before 1.5 µL of anti-PS1 antibody was added to each reaction, and the mixture was incubated overnight in a cold room. The immunoprecipitated complexes were captured by protein A beads, which were washed three times with the lysis buffer.  $\gamma$ -Secretase complexes were released from the beads by incubation in Laemmli buffer at 37 °C for 15 min.

**Coimmunoprecipitation of APP C-Terminal Fragments with  $\gamma$ -Secretase Complex.** NCT<sup>−/−</sup> fibroblasts were transiently cotransfected with Aph-1aL-Myc-His, PS1, PEN-2-CT11, and one of the NCT variants, including full-length ECD, WT NCT, NCT L571P, and NCT  $\Delta$ L571. The control cells were transfected with Aph-1aL-Myc-His, PS1, PEN-2-CT11, and empty vector. Forty-four hours after transfection, cells were treated with 2 µM of L685,458 for 4 h. The cells were washed twice with DPBS (Invitrogen) at room temperature. Then the cells were incubated with 1 mM DSP [dithiobis(succinimidylpropionate); Pierce] in DPBS at room temperature for 20 min with gentle shaking. To terminate the reaction, cells were washed with DPBS containing 50 mM Tris (pH 7.4). Cells were then washed twice with cold DPBS and lysed in lysis buffer containing 50 mM Tris (pH 7.4), 150 mM NaCl, 5 mM EDTA, 0.5% Nonidet P-40, 0.5% sodium deoxycholate, 0.25% SDS, and protease inhibitor mixture (Sigma). Protein G beads-cleared cell lysates were immunoprecipitated with the NCT-specific Mab5226A in a cold room overnight, and the immunoprecipitated protein complex was captured by protein G beads. After extensive washing with lysis buffer, captured protein complex was released from the beads with Laemmli buffer.

**Reagents for Mass Spectrometry Analysis.** Ammonium bicarbonate (NH<sub>4</sub>HCO<sub>3</sub>), iodoacetamide, and formic acid were purchased from Sigma-Aldrich. Trifluoroacetic acid and Tris(2-carboxyethyl)phosphine were obtained from Pierce (Thermo Fisher Scientific). Bovine trypsin and chymotrypsin were acquired from Roche Applied Science. HPLC-grade water and acetonitrile (ACN) were from Thermo Fisher Scientific. POROS 20 R2 beads were from Applied Biosystems, and C18 ZipTips were from Millipore (Thermo Fisher Scientific).

**In-Gel Tryptic Digestion of Proteins.** Coomassie-stained protein bands were excised from the gels and destained with 45% acetonitrile in 100 mM ammonium bicarbonate. The resulting gel slices were incubated with 10 mM Tris(2-carboxyethyl)phosphine hydrochloride, alkylated by the addition of 50 mM iodoacetamide, and then, for the first gel preparation, digested in situ with trypsin (150 ng per band in 100 mM ammonium bicarbonate). For



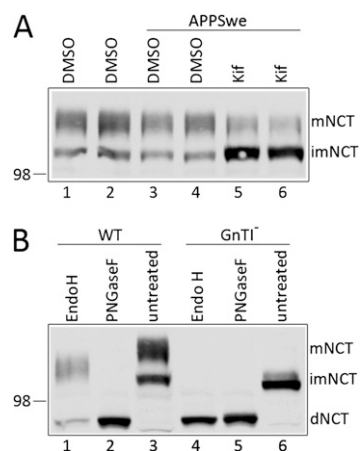

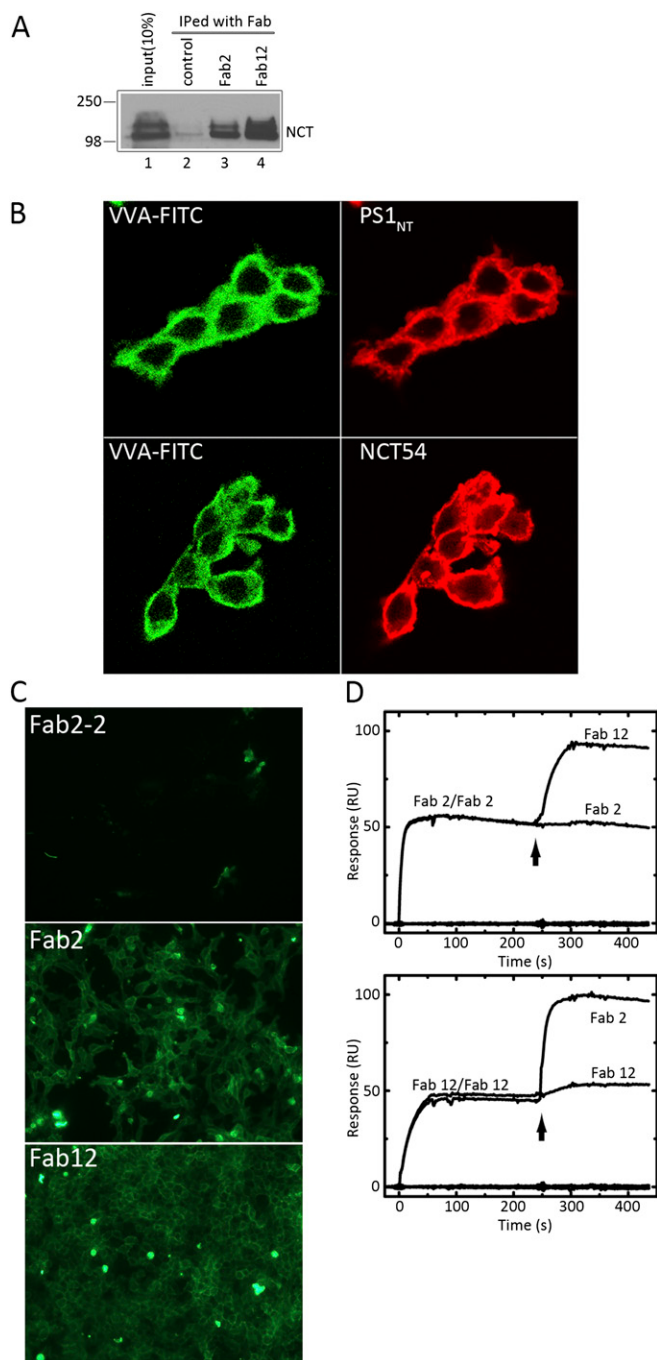

**Fig. S2.** Fab2 and Fab12 recognize full-length, CT11-tagged NCT. (A) Membrane fractions from HEK293S TAP-ANPP cells were immunoprecipitated with Fab 12, Fab 2, a NCT-specific Mab5226A, and a negative control Fab, and recovered NCT was detected by anti-CT11 antibody. (B) Accumulation of PS1 and NCT on the surface of ANPP.8 cells. VVA-FITC decorates plasma membrane glycoproteins (*Left*). Localization of PS1 (*Upper Right*) and NCT (*Lower Right*) is visualized by indirect immunofluorescence microscopy. (C) Immunostaining of HEK293 ANPP cells with Fab 2-2 (*Top*), Fab2 (*Middle*), and Fab12 (*Bottom*). (D) SPR result of sequential injection of Fab2 or Fab12 onto chips immobilized with ECD, demonstrating that Fab2 and Fab12 recognize different regions of ECD.

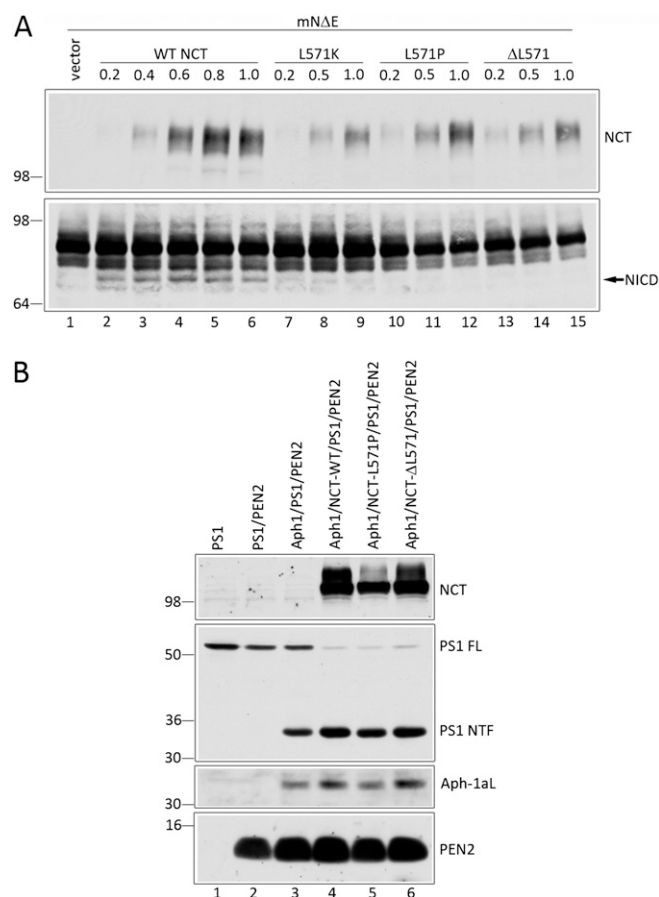

**Fig. S3.** L571 mutant NCT impairs  $\gamma$ -secretase activity, despite assembly into  $\gamma$ -secretase complexes. (A) NCT<sup>-/-</sup> cells transiently cotransfected with mNΔE and different amounts of WT or mutant NCT cDNAs. Expression of NCT (Upper) and mNΔE/NICD (Lower) are shown. (B) NCT<sup>-/-</sup> cells were transiently transfected with cDNAs encoding different  $\gamma$ -secretase components, singly or in combination, and lysates probed with antibodies specific for PS1, PEN-2, NCT, or Aph-1aL.

**Table S1. Determination of *N*-linked glycosylation sites of purified ECD fragment by mass spectrometry analysis**

| Amino acid residue | Reference | Identified in (Endo H-treated) |                                | Identified in (PNGase F-treated)      |                                            |
|--------------------|-----------|--------------------------------|--------------------------------|---------------------------------------|--------------------------------------------|
|                    |           | Trypsin digestion (gel 1)      | Chymotrypsin digestion (gel 2) | Trypsin digestion (gel 1) deamidation | Chymotrypsin digestion (gel 2) deamidation |
| 45                 | (1)       | Yes                            | Yes                            | Yes                                   | Yes                                        |
| 55                 | Potential | Yes                            |                                | Yes                                   |                                            |
| 187                | (1)       | Yes                            | Yes                            | Yes                                   | Yes                                        |
| 200                | Potential |                                | Yes                            | Yes                                   |                                            |
| 204                | Potential | Yes                            | Yes                            | Yes                                   | Yes                                        |
| 264                | Potential | Yes                            | Yes                            | Yes                                   | Yes                                        |
| 387                | (1, 2)    | Yes                            | Yes                            | Yes                                   |                                            |
| 417                | Potential | Yes                            | Yes                            | Yes                                   |                                            |
| 435                | Potential | Yes                            | Yes                            | Yes                                   | Yes                                        |
| 464                | Potential | Yes                            |                                | Yes                                   |                                            |
| 506                | Potential | Yes                            | Yes                            | Yes                                   | Yes                                        |
| 530                | Potential | Yes                            | Yes                            | Yes                                   | Yes                                        |
| 562                | Potential | Yes                            | Yes                            | Yes                                   |                                            |
| 573                | Potential | Yes                            | Yes                            | Yes                                   |                                            |
| 580                | Potential | Yes                            | Yes                            | Yes                                   |                                            |
| 612                | (3)       | Yes                            |                                | Yes                                   |                                            |

1. Chen R, et al. (2009) Glycoproteomics analysis of human liver tissue by combination of multiple enzyme digestion and hydrazide chemistry. *J Proteome Res* 8:651–661.
2. Zhang H, Li XJ, Martin DB, Aebersold R (2003) Identification and quantification of N-linked glycoproteins using hydrazide chemistry, stable isotope labeling and mass spectrometry. *Nat Biotechnol* 21:660–666.
3. Wollscheid B, et al. (2009) Mass-spectrometric identification and relative quantification of N-linked cell surface glycoproteins. *Nat Biotechnol* 27:378–386.
